# Supplementary material
Source: PubMed Central journal article supplement (PMC8009292)
Supplement: NIHMS1594849-supplement-Supplementary_Data_Summary.pdf [file NIHMS1594849-supplement-Supplementary_Data_Summary.pdf]

## **Supplemental Data Summary**

**Supplementary Figure S1:** Supplementary Figure S1 shows the fluorescence imaging dynamics of AR9.6-IRDye800 in a Colo357 subcutaneous xenograft model.

**Supplementary Figure S2:** Supplementary Figure S2 shows the biodistribution of fluorescent conjugates in subcutaneous xenografts at 144 h post-injection.

**Supplementary Figure S3:** Supplementary Figure S3 shows the internalization of AR9.6-IRDye800 *in vitro*.

**Supplementary Video S1:** Supplementary Video S1 shows surgical resection with AR9.6-IRDye800.

**Supplementary Video S2:** Supplementary Video S2 shows surgical resection with IgG-IRDye800.

Supplementary Data:

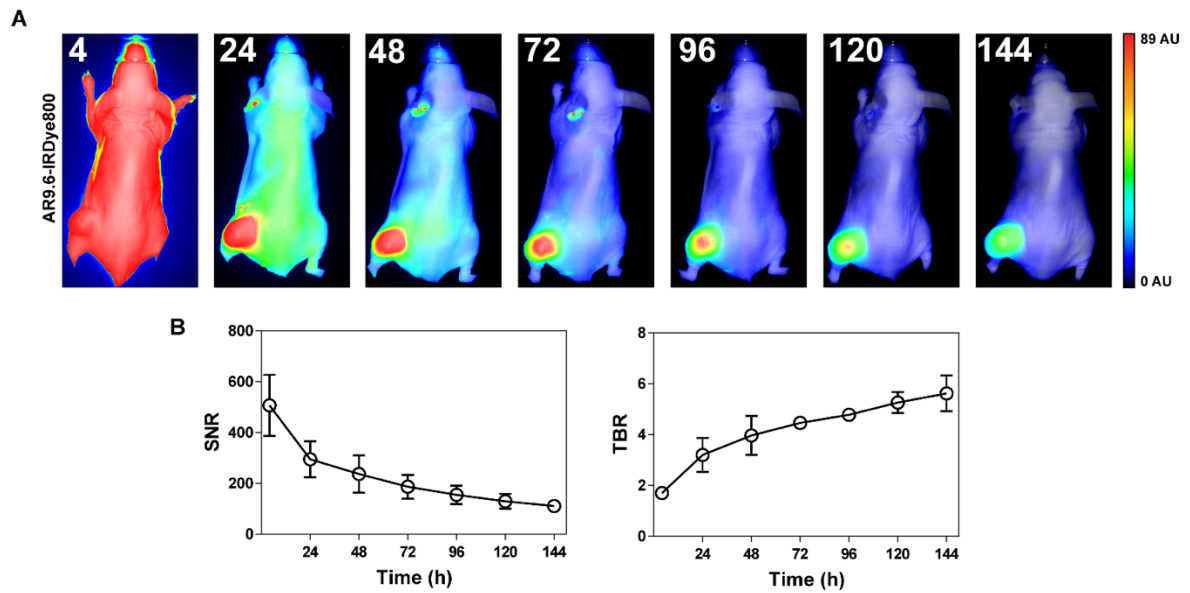

S1

**Supplemental Figure S1.** Biodistribution of AR9.6 in a Colo357 subcutaneous xenograft model over 144 h. (A) Representative images from LI-COR Pearl imaging, images on color bar scaled to arbitrary units (AU). (B) Tumor signal to noise ratio (SNR) and tumor to background ratio (TBR) over 144 h ( $N=4$ ).

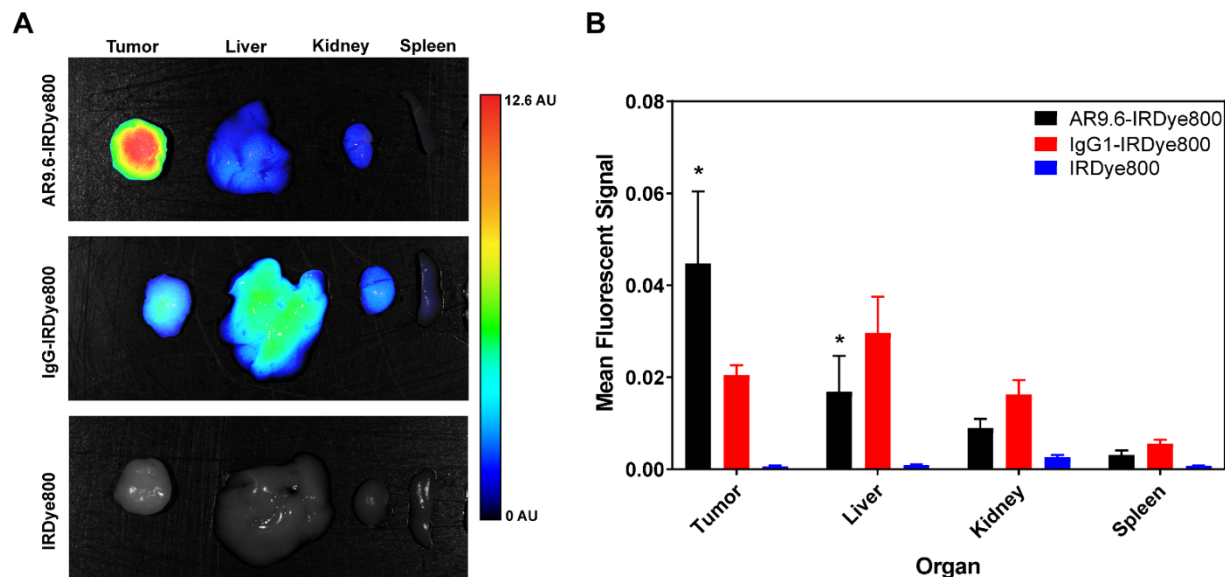

S2

**Supplemental Figure S2.** (A). Biodistribution of AR9.6-IRDye800, IgG-IRDye800, and unconjugated IRDye800 in key clearance organs at 144 h in subcutaneous T3M4 model from optimal imaging time study. Color bar scaled to normalized arbitrary units for all images. (B) Mean fluorescent signal in key clearance organs at 144 h ( $N=4$ ). Significance determined by Two way ANOVA, followed by Tukey's test for multiple comparisons. Tumor to tumor comparison:  $p < 0.0001$  for AR9.6-IRDye800 compared to IgG-IRDye800 and IRDye800. Tumor to liver comparison:  $p < 0.0085$  for AR9.6-IRDye800 compared to IgGIRDye800, and  $p < 0.009$  for AR9.6-IRDye800 compared to IRDye800.

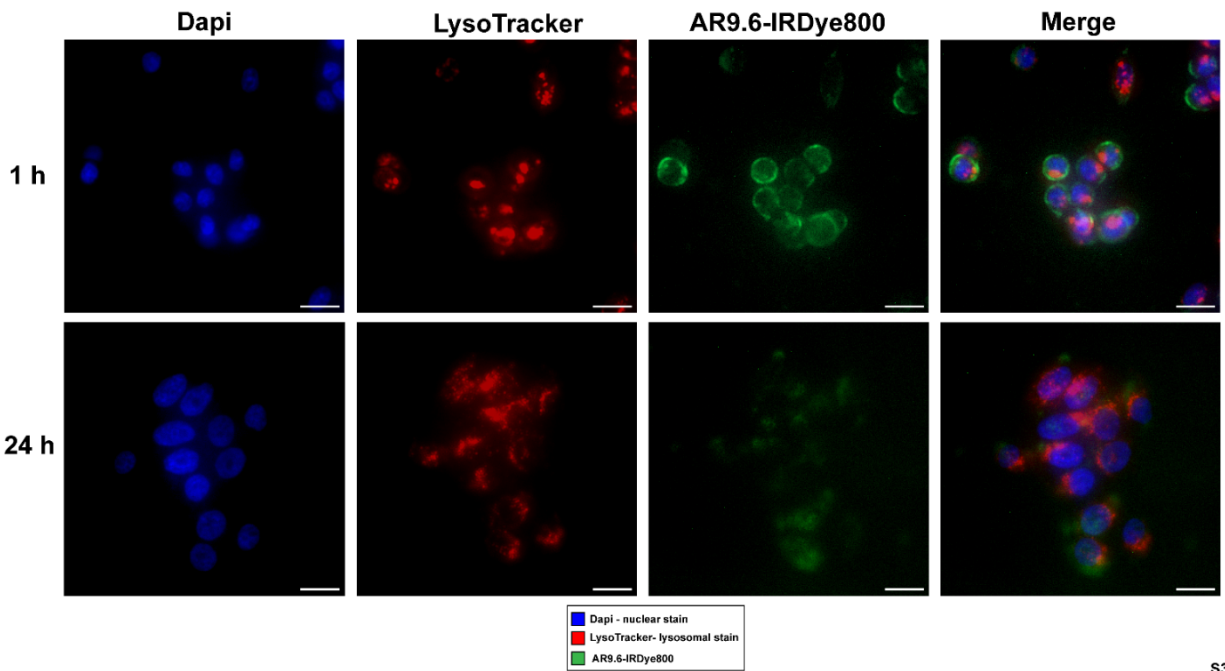

S3

**Supplemental Figure S3.** Internalization of AR9.6-IRDye800 at 1 hour and 24 hours after incubation.

**Supplemental Video S1.** Surgical resection of AR9.6-IRDye800 with Fluobeam imaging system.

**Supplemental Video S2.** Surgical resection of IgG-IRDye800 with Fluobeam imaging system.
